# Supplementary material for: Unraveling the effect of Gd doping on the structural, optical, and magnetic properties of ZnO based diluted magnetic semiconductor nanorods
Source: Royal Society of Chemistry journal article supplement (doi:10.1039/c9ra04750f), 2019-01-01
Supplement: c9ra04750f1.pdf [file c9ra04750f1.pdf]

## Supporting Information

### Unraveling the Effect of Gd Doping on the Structural, Optical, and Magnetic Properties of ZnO Based Diluted Magnetic Semiconductor Nanorods

Mohammed M. Obeid<sup>a,\*</sup>, Hamad R. Jappor<sup>b</sup>, Kutaiba Al-Marzoki<sup>a</sup>, Imad Ali Al-Hydary<sup>a</sup>,  
Shaker J. Edrees<sup>a</sup>, Majid M. Shukur<sup>a</sup>

<sup>a</sup>Department of Ceramic, College of Materials Engineering, University of Babylon, 51002,  
Hilla, Iraq

<sup>b</sup>Department of Physics, College of Education for Pure Sciences, University of Babylon,  
Hilla, Iraq

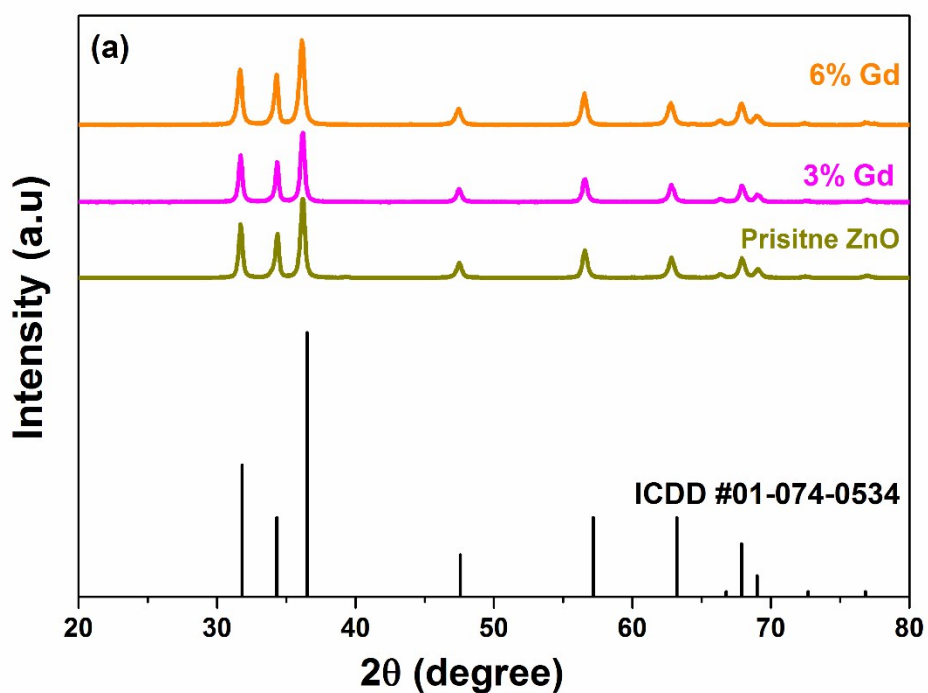

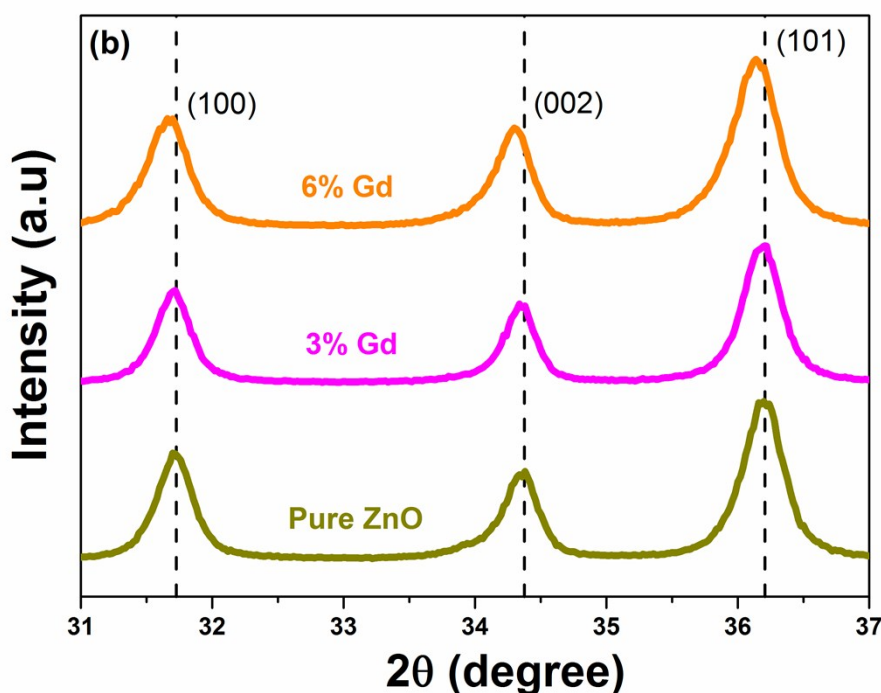

**Fig. S1.** (a) X-ray diffraction patterns of pristine and Gd-doped ZnO-NRs annealed at 400 °C for 1 hr and (b) shows shift of the diffraction peak along (100), (002) and (101) planes at varying doping concentrations.

**Table S1.** Rietveld refinement results of pristine and Gd-doped ZnO-NRs annealed at 400 °C for 1 hr.

| $Zn_{1-x}Gd_xO$ | $R_{exp}$ % | $R_B$ % | $R_{wp}$ % | GOF  | Site occupancy factor (SOF) |           |          |
|-----------------|-------------|---------|------------|------|-----------------------------|-----------|----------|
|                 |             |         |            |      | $Zn^{2+}$                   | $Gd^{3+}$ | $O^{-2}$ |
| $x=0$           | 8.27        | 3.17    | 13.50      | 2.66 | 1.00000                     | 0         | 0.98172  |
| $x=0.03$        | 8.78        | 2.79    | 12.10      | 1.89 | 0.96998                     | 0.03002   | 0.98912  |
| $x=0.06$        | 7.30        | 2.36    | 12.61      | 2.98 | 0.93978                     | 0.05989   | 1.00000  |

For stoichiometric ZnO, the atomic occupancy should be 1:1 for Zn and O. It can be seen from **Table S1** that pristine ZnO nanorods have shown oxygen deficiency. At  $x = 0$ , the oxygen occupancy is around 0.981, thus, this decrement of O occupancy in the pristine ZnO indicates the oxygen deficiency. This is lead to an intrinsic *n*-type conductivity. The results agree well with the recent published report by Dillip *et al.* <sup>71</sup>, but they are contradicted with the results obtained from EDX quantitative analysis and

PL analysis for pure ZnO, see **Fig. S3** and **Fig. 7**, respectively. The XRD Rietveld-refined structure of pristine ZnO contains O-vacancy is presented in **Fig. S2(a)**. The  $\text{Zn}_{1-x}\text{Gd}_x\text{O}$  ( $x = 0.06$ ) has revealed the formation of Zn vacancies via substitution Gd doping in ZnO host lattice, which leads to *p*-type conductivity of ZnO (see-**Table S1**). Therefore, the  $\text{Zn}_{1-x}\text{Gd}_x\text{O}$  ( $x = 0.06$ ) demonstrates higher Zn vacancies as compared to the O vacancies. This is in lines with the results obtained from EDX and PL analysis.

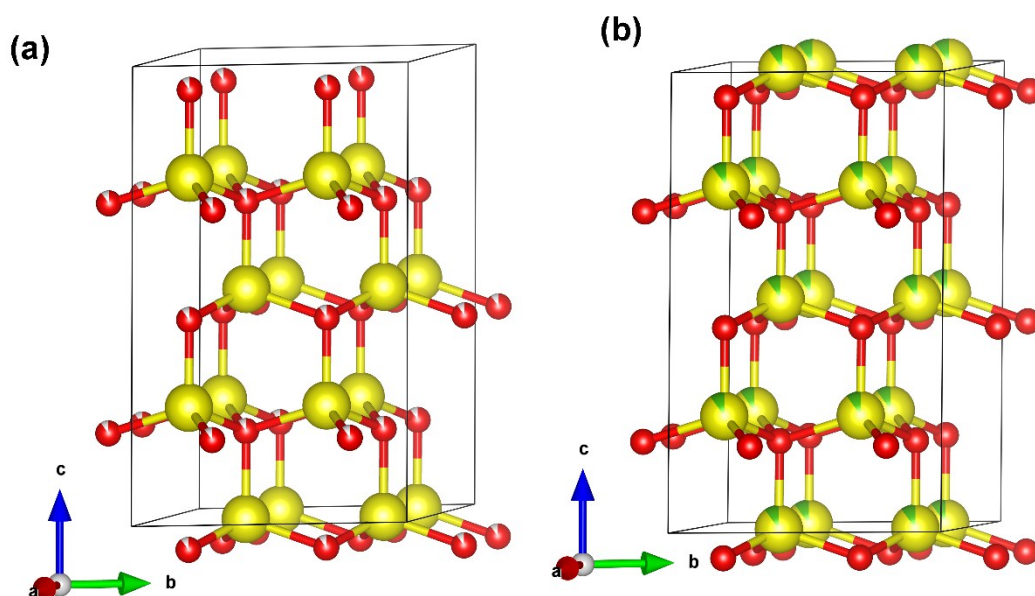

**Fig. S2.** The XRD Rietveld-refined structures of pristine ZnO (a) and  $\text{Zn}_{0.94}\text{Gd}_{0.06}\text{O}$  (b). The ZnO shows oxygen deficiency (O-gray in colour for vacancies). The  $\text{Zn}_{0.94}\text{Gd}_{0.06}\text{O}$  reveals higher Zn vacancies compared to the O vacancies. The deficiencies are noticeably seen in the right side figure (Zn-green in color for vacancies). If we consider the total area of a Zn atom as 1 in the  $\text{Zn}_{0.94}\text{Gd}_{0.06}\text{O}$  (bearing in mind that the Zn atoms are expected as circles in a 2D plane), then the area of the green portion is approximately 6% of the total area (because the corresponding Zn-occupancy is about 0.94, *SOF. Table S1*). This indicates that, in a unit cell of  $\text{Zn}_{0.94}\text{Gd}_{0.06}\text{O}$ , 6% of the Zn-sites will be vacant (which would eventually be occupied by Gd-atoms via substitutional doping), and only 94% of the Zn sites will be occupied by Zn atoms.

**Table S2.** Structural parameters of pristine and Gd-doped ZnO-NRs annealed at 400 °C.

| $Zn_{1-x}Gd_xO$ | W-H plot  |                                                        | Scherrer  | Lattice constant<br>$a$ (c) (Å) | $c/a$  | R      | Cell volume<br>(Å <sup>3</sup> ) | Bond<br>length Zn-O<br>(Zn-Zn) (Å) | $\rho$ 10 <sup>-4</sup><br>(nm) <sup>-2</sup> |
|-----------------|-----------|--------------------------------------------------------|-----------|---------------------------------|--------|--------|----------------------------------|------------------------------------|-----------------------------------------------|
|                 | Size (nm) | $\langle \epsilon^2 \rangle^{1/2}$ (10 <sup>-4</sup> ) | Size (nm) |                                 |        |        |                                  |                                    |                                               |
| $x=0$           | 29.8      | 9                                                      | 23.23     | 3.2483(5.2084)                  | 1.6034 | 1.0184 | 47.5933                          | 1.986(3.2483)                      | 11.26                                         |
| $x=0.03$        | 31.6      | 6                                                      | 26.72     | 3.2475(5.2058)                  | 1.6030 | 1.0186 | 47.5456                          | 1.987(3.2475)                      | 10.01                                         |
| $x=0.06$        | 28.9      | 10                                                     | 19.9      | 3.2475(5.2073)                  | 1.6034 | 1.0184 | 47.5595                          | 1.991(3.2475)                      | 11.97                                         |

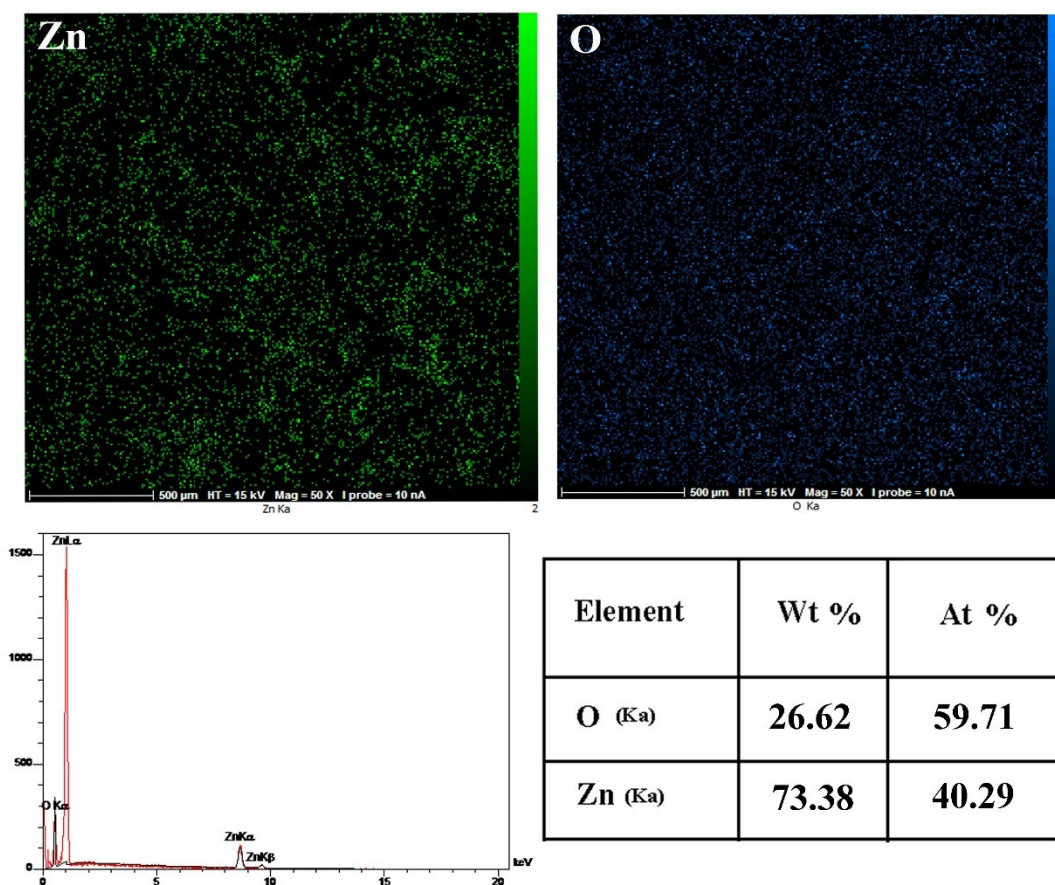

**Fig. S3.** EDX elemental mapping and spectrum of un-doped ZnO.

**Table S3.** Calculated results for optimized defect-bearing structures; formation energy  $\Delta E_{O, Zn}$  in O-rich and Zn-rich conditions, minimum value of the energy band gaps ( $E_{\text{gap}}$ ). Characters of [ $\uparrow$ ], [ $\downarrow$ ], [d] and [i] denote for spin-up, spin-down, direct and indirect band gap, respectively, magnetic moment per supercell ( $\mu$ ) (NM is for nonmagnetic systems).

|                       | ZnO      | Zn <sub>15</sub> GdO <sub>16</sub> | Zn <sub>15</sub> GdO <sub>16</sub> + V <sub>Zn</sub> | Zn <sub>15</sub> GdO <sub>16</sub> + V <sub>O</sub> |
|-----------------------|----------|------------------------------------|------------------------------------------------------|-----------------------------------------------------|
| $\Delta E_{Zn}$ (eV)  | -        | -2.48                              | -2.05                                                | -2.33                                               |
| $\Delta E_O$ (eV)     | -        | -3.17                              | -3.43                                                | -2.33                                               |
| $E_{\text{gap}}$ (eV) | 3.38 [d] | 3.26 [d]                           | 3.70 [ $\uparrow$ ]<br>0.39 [ $\downarrow$ ]         | 1.36 [i]                                            |
| $\mu$ ( $\mu_B$ )     | NM       | 7.007                              | 8.00                                                 | 7.04                                                |

## References

- 73 Dillip, G., Banerjee, A. & Joo, S. Conductivity inversion of ZnO nanoparticles in ZnO-carbon nanofiber hybrid thin film devices by surfactant-assisted C-doping and non-rectifying, non-linear electrical properties via interfacial trap-induced tunneling for stress-grading applications. *Journal of Applied Physics* **125**, 175106 (2019).
